# Supplementary material for: When catchers meet – a computational study on the dimerization of the Buckycatcher
Source: Royal Society of Chemistry journal article supplement (doi:10.1039/d3cp02903d), 2023-01-01
Supplement: d3cp02903d1.xlsx [file d3cp02903d1.xlsx]

## Sheet: Thermodynamics binding
T	300		BASE DATA				ENTHALPY			GIBBS FREE ENERGY (GAS)			ALPB	GIBBS FREE ENERGY (TOLUENE)			REDUCED GIBBS FREE ENERGY			BOLTZMANN FACTORS			WEIGHTS			CONFORMATIONAL ENTROPY			WEIGHTED GIBBS FREE ENERGY (TOLUENE)					AVERAGED GIBBS FREE ENERGY (TOLUENE)
			H(PM6-D3H4)	S	H(PM6-D3H4)	S	PM6-D3H4	PBE-D3BJ	PBE-D3BJ (ATM)	PM6-D3H4	PBE-D3BJ	PBE-D3BJ (ATM)		PM6-D3H4	PBE-D3BJ	PBE-D3BJ (ATM)	PM6-D3H4	PBE-D3BJ	PBE-D3BJ (ATM)	PM6-D3H4	PBE-D3BJ	PBE-D3BJ (ATM)	PM6-D3H4	PBE-D3BJ	PBE-D3BJ (ATM)	PM6-D3H4	PBE-D3BJ	PBE-D3BJ (ATM)	PM6-D3H4	PBE-D3BJ	PBE-D3BJ (ATM)			PM6-D3H4	PBE-D3BJ	PBE-D3BJ (ATM)
			J/mol	J/K/mol	kcal/mol	kcal/K/mol		def2-TZVP	def2-TZVP		def2-TZVP	def2-TZVP			def2-TZVP	def2-TZVP		def2-TZVP	def2-TZVP		def2-TZVP	def2-TZVP		def2-TZVP	def2-TZVP		def2-TZVP	def2-TZVP		def2-TZVP	def2-TZVP				def2-TZVP	def2-TZVP
	Catcher	ii	-7.43155e+08	862.655	-177618	0.206179	-177618	-1.44369e+06	-1.44369e+06	-177680	-1.44375e+06	-1.44375e+06	-38.8909	-177719	-1.44379e+06	-1.44379e+06	0	0.0472393	0.199634	1	0.923819	0.715435	0.339735	0.308776	0.255875	0.366774	0.362855	0.348775	-60377.4	-445808	-369431		catcher	-177719	-1.44379e+06	-1.44379e+06
		ie	-7.43154e+08	866.933	-177618	0.207202	-177618	-1.44369e+06	-1.44369e+06	-177680	-1.44375e+06	-1.44375e+06	-38.8761	-177719	-1.44379e+06	-1.44379e+06	0.0382699	0	0	1.87565	2	2	0.637222	0.668476	0.7153	0.287156	0.269232	0.239663	-113247	-965141	-1.03275e+06		dimer	-355444	-2.88759e+06	-2.88759e+06
		iet	-7.43153e+08	861.265	-177618	0.205847	-177618	-1.44369e+06	-1.44369e+06	-177680	-1.44375e+06	-1.44375e+06	-34.885	-177714	-1.44379e+06	-1.44379e+06	4.69193	6.29217	7.81294	0.000763917	5.21551e-05	4.06859e-06	0.000259529	1.74322e-05	1.45513e-06	0.00214284	0.000191008	1.95576e-05	-46.1221	-25.1684	-2.1009		dimerization	-6.06192	-3.17742	-0.406618
		ee	-7.43152e+08	852.465	-177617	0.203744	-177617	-1.44369e+06	-1.44369e+06	-177679	-1.44375e+06	-1.44375e+06	-38.9183	-177718	-1.44379e+06	-1.44379e+06	1.61092	1.60256	1.50137	0.0670617	0.0680084	0.0805898	0.0227832	0.022731	0.0288229	0.0861599	0.0860147	0.102223	-4048.97	-32818.8	-41614.3			CONFORMATIONAL ENTROPY
	Dimer	1	-1.48648e+09	1480.87	-355278	0.353937	-355278	-2.88742e+06	-2.88742e+06	-355384	-2.88753e+06	-2.88752e+06	-60.625	-355444	-2.88759e+06	-2.88758e+06	0	0	2.64793	1	1	0.0117769	0.887441	0.447032	0.00555393	0.105972	0.359917	0.028843	-315436	-1.29085e+06	-16037.4			PM6-D3H4	PBE-D3BJ	PBE-D3BJ (ATM)
		2	-1.48643e+09	1497.06	-355265	0.357805	-355265	-2.88741e+06	-2.88741e+06	-355372	-2.88752e+06	-2.88752e+06	-70.2236	-355443	-2.88759e+06	-2.88759e+06	1.86779	0.372709	0	0.0871724	1.07033	2	0.0773603	0.478473	0.94319	0.197987	0.352709	0.0551648	-27497.2	-1.38163e+06	-2.72354e+06				def2-TZVP	def2-TZVP
		3	-1.48642e+09	1475.36	-355264	0.352619	-355264	-2.88741e+06	-2.88741e+06	-355369	-2.88752e+06	-2.88751e+06	-64.8609	-355434	-2.88758e+06	-2.88758e+06	10.3077	5.5991	6.31421	3.09757e-08	8.3399e-05	2.51312e-05	2.74891e-08	3.72821e-05	1.18517e-05	4.78571e-07	0.000380165	0.000134435	-0.00977057	-107.655	-34.2228		catcher	0.442492	0.42822	0.411759
		4	-1.48638e+09	1505.05	-355254	0.359715	-355254	-2.8874e+06	-2.8874e+06	-355362	-2.88751e+06	-2.88751e+06	-74.2612	-355436	-2.88759e+06	-2.88758e+06	8.53032	4.14958	2.74377	6.10689e-07	0.000948655	0.010028	5.4195e-07	0.000424079	0.00472916	7.81931e-06	0.00329323	0.0253199	-0.192629	-1224.57	-13655.8		dimer	0.271894	0.587701	0.17962
		5A	-1.48639e+09	1512.5	-355256	0.361497	-355256	-2.8874e+06	-2.8874e+06	-355365	-2.88751e+06	-2.88751e+06	-71.4516	-355436	-2.88758e+06	-2.88758e+06	8.39367	7.70137	6.7477	7.6801e-07	2.45296e-06	1.21457e-05	6.81563e-07	1.09655e-06	5.72786e-06	9.67743e-06	1.50483e-05	6.91362e-05	-0.242252	-3.16638	-16.5396		dimerization	-0.613091	-0.268739	-0.643898
		5B	-1.48639e+09	1494.83	-355255	0.357272	-355255	-2.8874e+06	-2.88739e+06	-355362	-2.88751e+06	-2.8875e+06	-63.5954	-355425	-2.88757e+06	-2.88756e+06	19.0206	21.1494	23.809	1.39268e-14	3.91793e-16	4.52497e-18	1.23592e-14	1.75144e-16	2.13395e-18	3.95797e-13	6.35439e-15	8.68274e-17	-4.39279e-09	-5.05741e-10	-6.16192e-12			GIBBS FREE ENERGY (TOLUENE)
		6	-1.48643e+09	1495.38	-355266	0.357404	-355266	-2.88741e+06	-2.88741e+06	-355373	-2.88752e+06	-2.88751e+06	-66.7468	-355440	-2.88759e+06	-2.88758e+06	4.85038	3.87277	4.56054	0.000292812	0.00150924	0.000476138	0.000259853	0.000674681	0.000224544	0.00214519	0.00492603	0.00188649	-92.362	-1948.2	-648.39			PM6-D3H4	PBE-D3BJ	PBE-D3BJ (ATM)
		7A	-1.48639e+09	1508.57	-355256	0.360556	-355256	-2.8874e+06	-2.8874e+06	-355364	-2.88751e+06	-2.88751e+06	-73.1124	-355437	-2.88759e+06	-2.88758e+06	7.22927	4.65671	3.40738	5.41516e-06	0.000405205	0.00329448	4.80564e-06	0.00018114	0.00155366	5.88485e-05	0.00156074	0.0100477	-1.7081	-523.057	-4486.32				def2-TZVP	def2-TZVP
		7B	-1.48638e+09	1491.8	-355252	0.356549	-355252	-2.8874e+06	-2.88739e+06	-355359	-2.8875e+06	-2.8875e+06	-65.3937	-355425	-2.88757e+06	-2.88756e+06	19.8297	21.4895	23.135	3.58473e-15	2.21457e-16	1.40151e-17	3.18124e-15	9.89984e-17	6.60943e-18	1.06194e-13	3.64823e-15	2.61456e-16	-1.13069e-09	-2.85865e-10	-1.90852e-11		dimerization	-5.44883	-2.90868	0.23728
		8A	-1.48639e+09	1503.11	-355256	0.359251	-355256	-2.8874e+06	-2.88739e+06	-355364	-2.8875e+06	-2.8875e+06	-72.0667	-355436	-2.88758e+06	-2.88757e+06	8.86734	13.2969	12.1004	6.93959e-07	4.11628e-10	3.06266e-09	6.15847e-07	1.84011e-10	1.44433e-09	8.80678e-06	4.1248e-09	2.94003e-08	-0.218894	-0.000531346	-0.00417062
		8B	-1.48639e+09	1489.48	-355256	0.355994	-355256	-2.8874e+06	-2.88739e+06	-355363	-2.88751e+06	-2.8875e+06	-63.6188	-355426	-2.88757e+06	-2.88756e+06	18.2198	19.6217	22.3117	1.06724e-13	1.01614e-14	1.11523e-16	9.47108e-14	4.54249e-15	5.25936e-17	2.84018e-12	1.50017e-13	1.97142e-15	-3.36627e-08	-1.31168e-08	-1.51868e-10				∆Gsimple	Sconf	Gfull
		9	-1.48633e+09	1511.01	-355242	0.361139	-355242	-2.88739e+06	-2.88739e+06	-355351	-2.8875e+06	-2.8875e+06	-76.3717	-355427	-2.88758e+06	-2.88758e+06	17.5255	12.8273	10.4559	1.71e-13	4.52404e-10	2.41568e-08	1.51752e-13	2.02239e-10	1.13922e-08	4.47919e-12	4.5143e-09	2.08368e-07	-5.39367e-08	-0.000583982	-0.0328959		PM6-D3H4		-6.06192	-0.613091	-5.44883
		10	-1.48645e+09	1495.84	-355271	0.357515	-355271	-2.88742e+06	-2.88741e+06	-355378	-2.88752e+06	-2.88752e+06	-64.3476	-355442	-2.88759e+06	-2.88758e+06	2.11705	1.67819	3.29694	0.0286927	0.0599059	0.00396499	0.0254631	0.0267799	0.00186987	0.0934629	0.0969459	0.0117463	-9050.65	-77329.2	-5399.4		PBE-D3BJ	def2-TZVP	-3.17742	-0.268739	-2.90868
		11	-1.48646e+09	1483.52	-355272	0.354569	-355272	-2.88742e+06	-2.88741e+06	-355378	-2.88752e+06	-2.88752e+06	-62.713	-355441	-2.88759e+06	-2.88758e+06	3.53896	3.95862	6.1182	0.00264198	0.00130683	3.49143e-05	0.0023446	0.000584194	1.64654e-05	0.0141981	0.00434948	0.000181354	-833.368	-1686.91	-47.5452		PBE-D3BJ (ATM)	def2-TZVP	-0.406618	-0.643898	0.23728
		12	-1.48642e+09	1503.19	-355263	0.359272	-355263	-2.88741e+06	-2.88741e+06	-355370	-2.88752e+06	-2.88751e+06	-67.2863	-355438	-2.88758e+06	-2.88758e+06	6.87457	5.2878	5.56041	9.81751e-06	0.000140583	8.89909e-05	8.71246e-06	6.28451e-05	4.19677e-05	0.000101507	0.000608016	0.000422976	-3.09674	-181.47	-121.185
		13	-1.4864e+09	1510.79	-355259	0.361088	-355259	-2.88741e+06	-2.8874e+06	-355367	-2.88751e+06	-2.88751e+06	-70.6672	-355438	-2.88759e+06	-2.88758e+06	6.4728	4.61062	4.02872	1.92612e-05	0.000437773	0.00116184	1.70932e-05	0.000195699	0.00054792	0.000187629	0.00167106	0.00411454	-6.07556	-565.097	-1582.16
		14	-1.48643e+09	1497.82	-355264	0.357987	-355264	-2.88741e+06	-2.88741e+06	-355372	-2.88752e+06	-2.88752e+06	-69.5261	-355441	-2.88759e+06	-2.88758e+06	3.25195	1.41496	1.59348	0.00427579	0.0931599	0.0690525	0.00379451	0.0416455	0.0325648	0.0211514	0.132373	0.111519	-1348.73	-120255	-94033.6
		15	-1.4864e+09	1511.51	-355258	0.36126	-355258	-2.88741e+06	-2.8874e+06	-355366	-2.88752e+06	-2.88751e+06	-70.7853	-355437	-2.88759e+06	-2.88758e+06	7.33413	3.48014	2.59658	4.54172e-06	0.00291595	0.0128362	4.03051e-06	0.00130352	0.00605349	5.00654e-05	0.0086589	0.0309159	-1.43259	-3764.04	-17480
		16	-1.48639e+09	1509.47	-355257	0.360771	-355257	-2.8874e+06	-2.8874e+06	-355365	-2.88751e+06	-2.88751e+06	-73.0799	-355438	-2.88759e+06	-2.88758e+06	6.35239	3.85488	2.91538	2.35723e-05	0.00155521	0.00751969	2.0919e-05	0.000695231	0.00354625	0.000225399	0.00505521	0.0200075	-7.43541	-2007.54	-10240.1
		17	-1.48643e+09	1464.83	-355265	0.350104	-355265	-2.88741e+06	-2.88741e+06	-355370	-2.88752e+06	-2.88751e+06	-63.3645	-355434	-2.88758e+06	-2.88758e+06	10.6823	8.58991	10.7997	1.65263e-08	5.52596e-07	1.3571e-08	1.46661e-08	2.47028e-07	6.40003e-09	2.64543e-07	3.75823e-06	1.20749e-07	-0.00521283	-0.713314	-0.0184806
		18	-1.48647e+09	1454.59	-355276	0.347654	-355276	-2.88742e+06	-2.88741e+06	-355380	-2.88752e+06	-2.88752e+06	-60.6957	-355441	-2.88759e+06	-2.88758e+06	3.89565	4.44585	7.14061	0.00290481	0.00115428	1.25668e-05	0.00257784	0.000516	5.92642e-06	0.015366	0.00390581	7.1331e-05	-916.27	-1489.99	-17.113
		19	-1.48637e+09	1472.62	-355250	0.351965	-355250	-2.8874e+06	-2.8874e+06	-355356	-2.8875e+06	-2.8875e+06	-74.3065	-355430	-2.88758e+06	-2.88758e+06	14.3552	12.0873	10.857	6.97481e-11	3.13079e-09	2.46568e-08	6.18973e-11	1.39956e-09	1.1628e-08	1.45493e-09	2.85331e-08	2.12442e-07	-2.20002e-05	-0.00404135	-0.0335768
		20A	-1.48638e+09	1483.59	-355253	0.354587	-355253	-2.8874e+06	-2.8874e+06	-355359	-2.88751e+06	-2.8875e+06	-72.0294	-355431	-2.88758e+06	-2.88758e+06	13.4417	10.3763	9.30738	3.22869e-10	5.52213e-08	3.31724e-07	2.86527e-10	2.46857e-08	1.56439e-07	6.29591e-09	4.3242e-07	2.4515e-06	-0.000101841	-0.0712819	-0.45173
		20B	-1.48637e+09	1452.98	-355251	0.34727	-355251	-2.88739e+06	-2.88739e+06	-355355	-2.8875e+06	-2.88749e+06	-64.0157	-355419	-2.88756e+06	-2.88756e+06	25.4479	26.818	29.365	5.79033e-19	5.81559e-20	8.1131e-22	5.13858e-19	2.59976e-20	3.8261e-22	2.16397e-17	1.17239e-18	1.88684e-20	-1.82635e-13	-7.50696e-14	-1.10481e-15
		21	-1.48642e+09	1463.44	-355263	0.349772	-355263	-2.88741e+06	-2.88741e+06	-355368	-2.88751e+06	-2.88751e+06	-66.6211	-355435	-2.88758e+06	-2.88758e+06	9.4428	8.42084	9.51242	2.64314e-07	1.46758e-06	2.35185e-07	2.34563e-07	6.56056e-07	1.10912e-07	3.58073e-06	9.34029e-06	1.7762e-06	-0.083372	-1.89442	-0.320267
		22A	-1.48637e+09	1483.56	-355250	0.354578	-355250	-2.8874e+06	-2.8874e+06	-355357	-2.8875e+06	-2.8875e+06	-74.6539	-355431	-2.88758e+06	-2.88758e+06	13.246	11.2646	9.76176	4.48304e-10	1.24442e-08	1.54799e-07	3.97844e-10	5.56295e-09	7.30023e-08	8.61131e-09	1.05736e-07	1.19963e-06	-0.000141406	-0.0160635	-0.2108
		22B	-1.48635e+09	1440.76	-355246	0.344351	-355246	-2.88739e+06	-2.88739e+06	-355349	-2.88749e+06	-2.88749e+06	-65.961	-355415	-2.88756e+06	-2.88755e+06	29.0488	29.7865	31.2987	1.37882e-21	4.0008e-22	3.16598e-23	1.22362e-21	1.78849e-22	1.49306e-23	5.89205e-20	8.95594e-21	7.84732e-22	-4.34895e-16	-5.16436e-16	-4.31129e-17
		23A	-1.48638e+09	1471.94	-355253	0.351803	-355253	-2.88739e+06	-2.88739e+06	-355359	-2.8875e+06	-2.8875e+06	-71.3029	-355430	-2.88757e+06	-2.88757e+06	14.463	19.796	18.9814	5.82137e-11	7.58587e-15	2.97463e-14	5.16612e-11	3.39113e-15	1.40282e-14	1.22366e-09	1.12984e-13	4.47467e-13	-1.83619e-05	-9.79213e-09	-4.05073e-08
		23B	-1.48638e+09	1457.43	-355254	0.348335	-355254	-2.8874e+06	-2.88739e+06	-355359	-2.8875e+06	-2.88749e+06	-63.0222	-355422	-2.88756e+06	-2.88756e+06	22.5311	26.2281	29.2526	7.71797e-17	1.56442e-19	9.79557e-22	6.84924e-17	6.99346e-20	4.61954e-22	2.54927e-15	3.08459e-18	2.26942e-20	-2.43437e-11	-2.01941e-13	-1.33392e-15
		24	-1.48642e+09	1461.07	-355262	0.349204	-355262	-2.88741e+06	-2.88741e+06	-355367	-2.88751e+06	-2.88751e+06	-68.5197	-355435	-2.88758e+06	-2.88758e+06	9.0419	7.82188	7.65973	5.17814e-07	4.00804e-06	5.26083e-06	4.59529e-07	1.79172e-06	2.48098e-06	6.70594e-06	2.37087e-05	3.20217e-05	-0.163333	-5.17375	-7.16403
		25	-1.48645e+09	1470	-355270	0.351338	-355270	-2.88742e+06	-2.88741e+06	-355375	-2.88752e+06	-2.88752e+06	-64.7121	-355440	-2.88759e+06	-2.88758e+06	4.67672	3.87617	5.66119	0.000783654	0.00300133	0.000150299	0.000695447	0.00134169	7.08804e-05	0.00505656	0.00887372	0.000677228	-247.189	-3874.26	-204.673
		26	-1.48643e+09	1458.16	-355266	0.348509	-355266	-2.88741e+06	-2.88741e+06	-355370	-2.88752e+06	-2.88751e+06	-66.0566	-355436	-2.88758e+06	-2.88758e+06	8.06407	6.4084	7.43247	2.66997e-06	4.29169e-05	7.70219e-06	2.36944e-06	1.91852e-05	3.63231e-06	3.0691e-05	0.000208378	4.5497e-05	-0.842185	-55.399	-10.4886
		27	-1.48643e+09	1458.57	-355266	0.348606	-355266	-2.88741e+06	-2.88741e+06	-355371	-2.88752e+06	-2.88751e+06	-65.8046	-355436	-2.88758e+06	-2.88758e+06	8.11226	6.18498	7.23773	2.46264e-06	6.24294e-05	1.06776e-05	2.18545e-06	2.7908e-05	5.03551e-06	2.84844e-05	0.00029266	6.14281e-05	-0.776787	-80.5866	-14.5404
		28	-1.48641e+09	1479.6	-355260	0.353633	-355260	-2.8874e+06	-2.8874e+06	-355366	-2.88751e+06	-2.88751e+06	-68.4083	-355434	-2.88758e+06	-2.88757e+06	10.1056	11.1864	11.421	8.69485e-08	1.41893e-08	9.57242e-09	7.71617e-08	6.3431e-09	4.5143e-09	1.2637e-06	1.19732e-07	8.67469e-08	-0.0274259	-0.0183162	-0.0130354
		29	-1.48642e+09	1466.43	-355264	0.350486	-355264	-2.88741e+06	-2.88741e+06	-355369	-2.88752e+06	-2.88751e+06	-66.9159	-355436	-2.88758e+06	-2.88758e+06	8.6763	7.83699	7.82068	9.56105e-07	3.90773e-06	4.01617e-06	8.48487e-07	1.74688e-06	1.89401e-06	1.18617e-05	2.31596e-05	2.4957e-05	-0.301583	-5.04426	-5.46909
		30	-1.48637e+09	1483.43	-355252	0.354549	-355252	-2.8874e+06	-2.8874e+06	-355358	-2.88751e+06	-2.8875e+06	-73.7419	-355432	-2.88758e+06	-2.88758e+06	12.623	10.6526	9.4782	1.27464e-09	3.47404e-08	2.4908e-07	1.13117e-09	1.55301e-08	1.17465e-07	2.33021e-08	2.79238e-07	1.8744e-06	-0.000402053	-0.0448443	-0.339189
	Energies		PM6-D3H4	PBE-D3BJ	PBE-D3BJ (ATM)					-177680	-1.44375e+06	-1.44375e+06		-177719	-1.44379e+06	-1.44379e+06	2.94347	2.99188	2.79603	1	1	1
	(kcal/mol)			def2-TZVP	def2-TZVP					-355384	-2.88753e+06	-2.88752e+06		-355444	-2.88759e+06	-2.88759e+06	1.12684	2.23697	2.12046	1	1	1
	Catcher	ii	-178054	-1.44413e+06	-1.44413e+06
		ie	-178053	-1.44413e+06	-1.44413e+06
		iet	-178053	-1.44413e+06	-1.44412e+06
		ee	-178053	-1.44413e+06	-1.44413e+06
	Dimer	1	-356149	-2.88829e+06	-2.88829e+06
		2	-356136	-2.88828e+06	-2.88828e+06
		3	-356136	-2.88829e+06	-2.88828e+06
		4	-356125	-2.88827e+06	-2.88827e+06
		5A	-356127	-2.88827e+06	-2.88827e+06
		5B	-356126	-2.88827e+06	-2.88826e+06
		6	-356137	-2.88828e+06	-2.88828e+06
		7A	-356127	-2.88828e+06	-2.88827e+06
		7B	-356124	-2.88827e+06	-2.88826e+06
		8A	-356127	-2.88827e+06	-2.88827e+06
		8B	-356127	-2.88827e+06	-2.88826e+06
		9	-356113	-2.88826e+06	-2.88826e+06
		10	-356142	-2.88829e+06	-2.88828e+06
		11	-356144	-2.88829e+06	-2.88828e+06
		12	-356134	-2.88828e+06	-2.88828e+06
		13	-356130	-2.88828e+06	-2.88827e+06
		14	-356136	-2.88828e+06	-2.88828e+06
		15	-356129	-2.88828e+06	-2.88828e+06
		16	-356128	-2.88828e+06	-2.88827e+06
		17	-356139	-2.88829e+06	-2.88828e+06
		18	-356150	-2.88829e+06	-2.88829e+06
		19	-356125	-2.88827e+06	-2.88827e+06
		20A	-356126	-2.88828e+06	-2.88827e+06
		20B	-356125	-2.88827e+06	-2.88826e+06
		21	-356138	-2.88828e+06	-2.88828e+06
		22A	-356124	-2.88827e+06	-2.88827e+06
		22B	-356121	-2.88827e+06	-2.88826e+06
		23A	-356126	-2.88827e+06	-2.88826e+06
		23B	-356128	-2.88827e+06	-2.88826e+06
		24	-356136	-2.88828e+06	-2.88828e+06
		25	-356144	-2.88829e+06	-2.88828e+06
		26	-356140	-2.88829e+06	-2.88828e+06
		27	-356141	-2.88829e+06	-2.88828e+06
		28	-356133	-2.88828e+06	-2.88827e+06
		29	-356138	-2.88828e+06	-2.88828e+06
		30	-356125	-2.88827e+06	-2.88827e+06
	Energies		PM6-D3H4	PBE-D3BJ	PBE-D3BJ (ATM)
	(Eh)			def2-TZVP	def2-TZVP
	Catcher	ii	-283.746	-2301.36	0.527196
		ie	-283.746	-2301.36	0.374801
		iet	-283.745	-2301.36	1.89557
		ee	-283.746	-2301.36	0.273608
	Dimer	1	-567.56	-4602.79	6.43973
		2	-567.539	-4602.77	3.41909
		3	-567.538	-4602.78	4.50691
		4	-567.521	-4602.76	2.38599
		5A	-567.525	-4602.76	2.83812
		5B	-567.522	-4602.75	6.45136
		6	-567.54	-4602.77	4.47957
		7A	-567.525	-4602.76	2.54247
		7B	-567.519	-4602.75	5.43727
		8A	-567.524	-4602.75	2.59534
		8B	-567.524	-4602.75	6.48176
		9	-567.502	-4602.74	1.42041
		10	-567.549	-4602.78	5.41054
		11	-567.551	-4602.78	5.95138
		12	-567.535	-4602.77	4.0644
		13	-567.529	-4602.76	3.2099
		14	-567.538	-4602.77	3.97032
		15	-567.528	-4602.76	2.90824
		16	-567.525	-4602.76	2.85229
		17	-567.544	-4602.78	6.00159
		18	-567.56	-4602.79	6.48656
		19	-567.522	-4602.75	2.56145
		20A	-567.524	-4602.76	2.7229
		20B	-567.521	-4602.75	6.33875
		21	-567.542	-4602.77	4.88337
		22A	-567.52	-4602.75	2.28894
		22B	-567.516	-4602.74	5.30404
		23A	-567.524	-4602.74	2.97719
		23B	-567.526	-4602.75	6.81634
		24	-567.539	-4602.77	3.62965
		25	-567.551	-4602.78	5.57682
		26	-567.546	-4602.78	4.81586
		27	-567.546	-4602.78	4.84455
		28	-567.535	-4602.76	4.02645
		29	-567.542	-4602.77	3.77548
		30	-567.522	-4602.75	2.61743
