# Supplementary material for: When catchers meet – a computational study on the dimerization of the Buckycatcher
Source: Royal Society of Chemistry journal article supplement (doi:10.1039/d3cp02903d), 2023-01-01
Supplement: d3cp02903d2.xlsx [file d3cp02903d2.xlsx]

## Sheet: Gas
	Binding Energies																Thermodynamics					Thermodynamic Correction					Thermdynamics
	Dimer	GFN2-xTB	M06-2X		R2SCAN-3C		PBE-D3BJ	PBE-D3BJ (ATM)	PM6-D3H4X	M06-2X	R2SCAN-3C		PBE-D3BJ	PBE-D3BJ (ATM)	PM6-D3H+		Dimer	GFN2-xTB	PM6-D3H4X	PM6-D3H+		Dimer	GFN2-xTB	PM6-D3H4X	PM6-D3H+		Dimer	GFN2-xTB	M06-2X		R2SCAN-3C		PBE-D3BJ	PBE-D3BJ (ATM)	PM6-D3H4X	M06-2X	R2SCAN-3C		PBE-D3BJ	PBE-D3BJ (ATM)
			def2-TZVP	6-31G*	6-31G*	cc-pVTZ	def2-TZVP	def2-TZVP		6-31G*	6-31G*	cc-pVTZ	def2-TZVP	def2-TZVP															def2-TZVP	6-31G*	6-31G*	cc-pVTZ	def2-TZVP	def2-TZVP		6-31G*	6-31G*	cc-pVTZ	def2-TZVP	def2-TZVP
	1	45.148	28.3659	35.1105	35.8334	29.1196	32.5985	26.537	42.054	38.8108	42.1002	36.2457	39.3581	33.9728	45.776		1	-26.283	-23.328	-25.303		1	18.865	18.726	20.473		1	-26.283	-9.50095	-16.2455	-16.9684	-10.2546	-13.7335	-7.67204	-23.328	-20.0848	-17.1074	-17.5197	-20.6321	-15.2468
	2	24.626	18.8714	22.38	27.6765	24.0762	27.137	24.5325	28.75	24.0015	28.7723	24.8159	27.5501	25.1854	30.856		2	-8.567	-11.862	-13.155		2	16.059	16.888	17.701		2	-8.567	-2.81238	-6.32098	-11.6175	-8.01722	-11.078	-8.4735	-11.862	-7.11353	-10.7885	-7.92795	-10.6621	-8.29741
	3	36.411	17.7266	24.355	28.5203	22.4237	25.6132	21.0445	29.2	25.7445	32.3311	27.4477	31.1015	27.1418	30.568		3	-15.09	-10.156	-11.117		3	21.321	19.044	19.451		3	-15.09	3.5944	-3.03402	-7.19934	-1.10272	-4.29224	0.276492	-10.156	-6.70052	-9.47634	-8.40368	-12.0575	-8.09781
	4	23.675	8.46339	11.2122	18.1584	15.9419	16.7399	14.7446	18.421	13.7676	19.9258	18.5277	19.9948	18.156	20.049		4	-8.713	-2.534	-2.649		4	14.962	15.887	17.4		4	-8.713	6.49861	3.74984	-3.19636	-0.979882	-1.77791	0.217431	-2.534	2.11939	-2.27136	-2.64066	-4.10776	-2.26899
	5A	25.25	14.6402	17.9476	18.9205	15.8333	16.6354	14.694	20.532	15.282	18.0559	15.5617	18.3575	16.269	22.669		5A	-9.071	-4.155	-4.969		5A	16.179	16.377	17.7		5A	-9.071	1.53882	-1.76862	-2.7415	0.345673	-0.456395	1.48503	-4.155	1.09504	-2.5435	0.815291	-1.98055	0.107974
	5B	22.691	10.1689	13.6422	17.5487	14.6073	17.4933	14.6104	20.108	13.654	17.4687	14.6665	18.3896	15.7294	22.387		5B	-7.767	-4.614	-5.773		5B	14.924	15.494	16.614		5B	-7.767	4.75506	1.28184	-2.62467	0.316659	-2.56931	0.313604	-4.614	1.84	-2.05467	0.827455	-2.89564	-0.235426
	6	35.141	17.6248	22.385	24.8648	20.0575	22.4659	18.4332	30.167	25.281	29.4546	25.7304	28.2776	24.5477	32.166		6	-16.92	-12.403	-12.92		6	18.221	17.764	19.246		6	-16.92	0.596245	-4.16397	-6.64381	-1.83649	-4.24486	-0.21219	-12.403	-7.51697	-7.10081	-7.96641	-10.5136	-6.78368
	7A	24.124	12.1365	15.1129	18.7781	16.1462	17.0656	15.2421	20.286	17.4889	20.9592	18.6205	19.9916	18.1987	21.702		7A	-8.145	-3.659	-4.698		7A	15.979	16.627	17.004		7A	-8.145	3.84246	0.866057	-2.79907	-0.167223	-1.08662	0.736852	-3.659	-0.861866	-2.15107	-1.99352	-3.36458	-1.57171
	7B	21.107	6.34958	9.37703	13.9923	11.4663	13.3307	11.2271	18.134	13.0371	17.4611	15.0457	16.8845	15.2383	16.302		7B	-6.651	-2.006	0.152		7B	14.456	16.128	16.454		7B	-6.651	8.10642	5.07897	0.46371	2.98972	1.12529	3.22893	-2.006	3.09086	2.13571	1.08232	-0.756472	0.889652
	8A	18.059	12.2772	15.4868	17.5307	14.6122	16.5092	14.7801	19.895	8.88056	11.3502	8.66059	12.5989	10.7532	22.24		8A	-1.66	-3.066	-4.962		8A	16.399	16.829	17.278		8A	-1.66	4.12175	0.912184	-1.13172	1.78676	-0.110233	1.6189	-3.066	7.94844	-0.701719	8.16841	4.23009	6.07583
	8B	18.166	12.5228	16.4369	18.8577	15.4736	18.9997	16.1268	21.104	17.5723	19.9333	16.7597	20.113	17.4224	23.815		8B	-2.399	-5.391	-8.107		8B	15.767	15.713	15.708		8B	-2.399	3.24425	-0.669937	-3.0907	0.29338	-3.23275	-0.359803	-5.391	-1.85934	-3.1447	-1.04668	-4.4	-1.70938
	9	16.243	-0.19021	2.43841	7.22812	5.4165	5.60408	4.21564	6.66	5.83957	9.1429	8.26014	8.55176	7.67857	7.627		9	-0.271	8.572	8.03		9	15.972	15.232	15.657		9	-0.271	16.1622	13.5336	8.74388	10.5555	10.3679	11.7564	8.572	9.39243	8.00388	6.97186	6.68024	7.55343
	10	37.585	19.7018	25.4354	28.2712	22.8227	26.0774	20.9308	35.23	30.9618	34.7668	30.0119	32.8879	28.3793	38.619		10	-19.286	-17.512	-18.628		10	18.299	17.718	19.991		10	-19.286	-1.40283	-7.13643	-9.97217	-4.52369	-7.77837	-2.63183	-17.512	-13.2438	-10.5532	-12.2939	-15.1699	-10.6613
	11	34.78	18.2249	23.1325	25.4265	20.5732	23.5003	19.1272	36.513	31.7292	35.0933	29.5286	33.3119	28.2626	40.138		11	-17.533	-17.725	-20.067		11	17.247	18.788	20.071		11	-17.533	-0.977931	-5.88553	-8.17948	-3.3262	-6.25333	-1.88017	-17.725	-12.9412	-6.63848	-10.7406	-14.5239	-9.47457
	12	33.463	19.0701	23.9296	24.3457	19.5836	21.109	17.3631	26.958	23.4018	27.0629	23.4766	25.7085	22.2925	29.677		12	-15.953	-10.502	-11.595		12	17.51	16.456	18.082		12	-15.953	-1.56008	-6.41962	-6.83566	-2.0736	-3.59897	0.146884	-10.502	-6.94575	-7.88966	-7.0206	-9.2525	-5.83651
	13	24.17	8.74223	12.2354	18.7436	15.6548	16.8792	14.513	23.469	20.5744	23.5294	20.242	22.4942	19.9327	26.271		13	-7.482	-7.523	-9.025		13	16.688	15.946	17.246		13	-7.482	7.94577	4.4526	-2.05562	1.03321	-0.191237	2.175	-7.523	-4.62842	-2.79762	-4.29605	-6.54823	-3.98674
	14	23.307	17.9022	22.2227	27.8228	23.7035	28.4778	24.9921	28.753	23.078	27.9568	23.6297	27.8394	24.6699	31.923		14	-6.043	-11.861	-13.413		14	17.264	16.892	18.51		14	-6.043	-0.638193	-4.95872	-10.5588	-6.43953	-11.2138	-7.7281	-11.861	-6.18599	-10.9308	-6.73768	-10.9474	-7.77789
	15	28.13	15.7711	19.6246	22.2928	18.6909	19.9979	17.6101	22.779	21.5878	25.1261	22.1937	23.8267	21.4656	24.957		15	-12.357	-7.206	-7.883		15	15.773	15.573	17.074		15	-12.357	0.00185441	-3.85165	-6.51975	-2.91788	-4.22485	-1.83707	-7.206	-6.01477	-6.71975	-6.6207	-8.25366	-5.89264
	16	23.914	11.2945	14.2503	18.3358	15.7446	16.7581	14.9051	20.292	17.2174	21.1499	18.7473	20.0941	18.2962	21.711		16	-9.417	-4.521	-4.913		16	14.497	15.771	16.798		16	-9.417	3.20254	0.246667	-3.83885	-1.2476	-2.26115	-0.408074	-4.521	-1.44641	-2.56485	-2.97634	-4.32314	-2.52524

## Sheet: Toluene
						Thermdynamics gas									Thermdynamics Toluene (ALPB)
	Dimer	ALPB	ALPBG	COSMO		Dimer	GFN2-xTB	PM6-D3H4X	M06-2X	R2SCAN-3C		PBE-D3BJ	PBE-D3BJ (ATM)		Dimer	GFN2-xTB	PM6-D3H4X	M06-2X	R2SCAN-3C		PBE-D3BJ	PBE-D3BJ (ATM)
									6-31G*	6-31G*	cc-pVTZ	def2-TZVP	def2-TZVP					6-31G*	6-31G*	cc-pVTZ	def2-TZVP	def2-TZVP
	1	17.1567	19.5543	7.05381		1	-26.283	-23.328	-20.0848	-17.1074	-17.5197	-20.6321	-15.2468		1	-6.72867	-6.17129	-2.92811	0.0493413	-0.362993	-3.47542	1.90991
	2	7.55817	7.14375	3.51866		2	-8.567	-11.862	-7.11353	-10.7885	-7.92795	-10.6621	-8.29741		2	-1.42325	-4.30383	0.444637	-3.23036	-0.369781	-3.10395	-0.739249
	3	12.9756	17.225	5.55624		3	-15.09	-10.156	-6.70052	-9.47634	-8.40368	-12.0575	-8.09781		3	2.13498	2.81956	6.27505	3.49923	4.57188	0.918055	4.87775
	4	3.57532	5.14314	4.51469		4	-8.713	-2.534	2.11939	-2.27136	-2.64066	-4.10776	-2.26899		4	-3.56986	1.04132	5.69471	1.30395	0.934659	-0.532441	1.30633
	5A	6.3007	7.75421	2.43446		5A	-9.071	-4.155	1.09504	-2.5435	0.815291	-1.98055	0.107974		5A	-1.31679	2.1457	7.39574	3.7572	7.11599	4.32015	6.40867
	5B	6.1745	6.44389	3.82558		5B	-7.767	-4.614	1.84	-2.05467	0.827455	-2.89564	-0.235426		5B	-1.32311	1.5605	8.0145	4.11983	7.00196	3.27886	5.93908
	6	7.01428	6.91339	2.99579		6	-16.92	-12.403	-7.51697	-7.10081	-7.96641	-10.5136	-6.78368		6	-10.0066	-5.38872	-0.502688	-0.0865359	-0.952136	-3.49937	0.230593
	7A	4.63989	5.35244	2.96012		7A	-8.145	-3.659	-0.861866	-2.15107	-1.99352	-3.36458	-1.57171		7A	-2.79256	0.980892	3.77803	2.48882	2.64638	1.27532	3.06818
	7B	4.37622	4.97846	3.31614		7B	-6.651	-2.006	3.09086	2.13571	1.08232	-0.756472	0.889652		7B	-1.67254	2.37022	7.46707	6.51193	5.45854	3.61975	5.26587
	8A	5.68556	5.46238	2.41899		8A	-1.66	-3.066	7.94844	-0.701719	8.16841	4.23009	6.07583		8A	3.80238	2.61956	13.634	4.98384	13.854	9.91565	11.7614
	8B	6.1511	6.22694	3.01658		8B	-2.399	-5.391	-1.85934	-3.1447	-1.04668	-4.4	-1.70938		8B	3.82794	0.760102	4.29176	3.00641	5.10442	1.7511	4.44172
	9	1.46477	4.13305	0.468		9	-0.271	8.572	9.39243	8.00388	6.97186	6.68024	7.55343		9	3.86205	10.0368	10.8572	9.46865	8.43663	8.14501	9.0182
	10	13.4194	15.526	5.53653		10	-19.286	-17.512	-13.2438	-10.5532	-12.2939	-15.1699	-10.6613		10	-3.75996	-4.09257	0.175636	2.86626	1.12555	-1.75047	2.75808
	11	15.054	13.9956	6.73769		11	-17.533	-17.725	-12.9412	-6.63848	-10.7406	-14.5239	-9.47457		11	-3.53743	-2.67103	2.11277	8.41549	4.31332	0.530021	5.5794
	12	10.5081	13.5093	4.91982		12	-15.953	-10.502	-6.94575	-7.88966	-7.0206	-9.2525	-5.83651		12	-2.4437	0.0061092	3.56236	2.61845	3.48751	1.25561	4.6716
	13	7.12723	6.99277	2.68503		13	-7.482	-7.523	-4.62842	-2.79762	-4.29605	-6.54823	-3.98674		13	-0.48923	-0.395768	2.49882	4.32961	2.83119	0.578998	3.14049
	14	8.28297	8.01147	3.41417		14	-6.043	-11.861	-6.18599	-10.9308	-6.73768	-10.9474	-7.77789		14	1.96847	-3.57803	2.09698	-2.64787	1.5453	-2.66443	0.505084
	15	7.05124	8.189	2.44565		15	-12.357	-7.206	-6.01477	-6.71975	-6.6207	-8.25366	-5.89264		15	-4.168	-0.154757	1.03647	0.331491	0.430544	-1.20242	1.1586
	16	4.70178	5.4438	3.12277		16	-9.417	-4.521	-1.44641	-2.56485	-2.97634	-4.32314	-2.52524		16	-3.9732	0.18078	3.25537	2.13693	1.72544	0.378637	2.17654
															Thermdynamics Toluene (COSMO)
															Dimer	GFN2-xTB	PM6-D3H4X	M06-2X	R2SCAN-3C		PBE-D3BJ	PBE-D3BJ (ATM)
																		6-31G*	6-31G*	cc-pVTZ	def2-TZVP	def2-TZVP
															1	-19.2292	-16.2742	-13.031	-10.0536	-10.4659	-13.5783	-8.19299
															2	-5.04834	-8.34334	-3.59487	-7.26986	-4.40929	-7.14345	-4.77875
															3	-9.53376	-4.59976	-1.14428	-3.9201	-2.84744	-6.50127	-2.54157
															4	-4.19831	1.98069	6.63408	2.24333	1.87403	0.406932	2.2457
															5A	-6.63654	-1.72054	3.5295	-0.109043	3.24975	0.453912	2.54243
															5B	-3.94142	-0.78842	5.66558	1.77091	4.65304	0.929939	3.59015
															6	-13.9242	-9.40721	-4.52118	-4.10502	-4.97062	-7.51786	-3.78789
															7A	-5.18488	-0.69888	2.09825	0.80905	0.966603	-0.404456	1.38841
															7B	-3.33486	1.31014	6.407	5.45185	4.39846	2.55967	4.20579
															8A	0.75899	-0.64701	10.3674	1.71727	10.5874	6.64908	8.49482
															8B	0.61758	-2.37442	1.15724	-0.128115	1.9699	-1.38342	1.3072
															9	0.197	9.04	9.86043	8.47188	7.43986	7.14824	8.02143
															10	-13.7495	-11.9755	-7.70726	-5.01664	-6.75734	-9.63337	-5.12482
															11	-10.7953	-10.9873	-6.20351	0.0992117	-4.00295	-7.78626	-2.73688
															12	-11.0332	-5.58218	-2.02593	-2.96984	-2.10078	-4.33268	-0.916685
															13	-4.79697	-4.83797	-1.94339	-0.11259	-1.61102	-3.8632	-1.30171
															14	-2.62883	-8.44683	-2.77182	-7.51668	-3.32351	-7.53323	-4.36372
															15	-9.91135	-4.76035	-3.56912	-4.2741	-4.17505	-5.80801	-3.44699
															16	-6.29423	-1.39823	1.67636	0.557924	0.146433	-1.20037	0.59753
															Thermdynamics Toluene (COSMO 2.38)
															Dimer	GFN2-xTB	PM6-D3H4X	M06-2X	R2SCAN-3C		PBE-D3BJ	PBE-D3BJ (ATM)
																		6-31G*	6-31G*	cc-pVTZ	def2-TZVP	def2-TZVP
														-3.18369	1	-22.4129	-19.4579	-16.2147	-13.2373	-13.6496	-16.762	-11.3767
														-1.58558	2	-6.63392	-9.92892	-5.18045	-8.85544	-5.99487	-8.72903	-6.36433
														-2.56245	3	-12.0962	-7.16221	-3.70673	-6.48255	-5.40989	-9.06372	-5.10402
														-2.19556	4	-6.39387	-0.21487	4.43852	0.0477673	-0.321528	-1.78863	0.0501434
														-1.16709	5A	-7.80363	-2.88763	2.36241	-1.27613	2.08266	-0.713178	1.37534
														-1.87538	5B	-5.8168	-2.6638	3.7902	-0.104475	2.77766	-0.945441	1.71477
														-2.52193	6	-16.4461	-11.9291	-7.04311	-6.62695	-7.49255	-10.0398	-6.30982
														-1.44138	7A	-6.62626	-2.14026	0.656874	-0.63233	-0.474777	-1.84584	-0.0529676
														-1.6625	7B	-4.99736	-0.35236	4.7445	3.78935	2.73596	0.897168	2.54329
														-1.13363	8A	-0.37464	-1.78064	9.2338	0.583641	9.45377	5.51545	7.36119
														-1.45307	8B	-0.83549	-3.82749	-0.29583	-1.58119	0.516831	-2.83649	-0.145869
														-0.1855	9	0.0115	8.8545	9.67493	8.28638	7.25436	6.96274	7.83593
														-2.55021	10	-16.2997	-14.5257	-10.2575	-7.56685	-9.30755	-12.1836	-7.67503
														-3.07327	11	-13.8686	-14.0606	-9.27678	-2.97406	-7.07622	-10.8595	-5.81015
														-2.30899	12	-13.3422	-7.89117	-4.33492	-5.27883	-4.40977	-6.64167	-3.22568
														-1.24877	13	-6.04574	-6.08674	-3.19216	-1.36136	-2.85979	-5.11197	-2.55048
														-1.55942	14	-4.18825	-10.0062	-4.33124	-9.0761	-4.88293	-9.09265	-5.92314
														-1.13555	15	-11.0469	-5.8959	-4.70467	-5.40965	-5.3106	-6.94356	-4.58254
														-1.45718	16	-7.75141	-2.85541	0.219177	-0.899256	-1.31075	-2.65755	-0.85965

## Sheet: Thermodynamics binding
T	300		BASE DATA				ENTHALPY						GIBBS FREE ENERGY (GAS)						ALPB	GIBBS FREE ENERGY (TOLUENE)						REDUCED GIBBS FREE ENERGY						BOLTZMANN FACTORS						WEIGHTS						CONFORMATIONAL ENTROPY
			H(PM6-D3H4)	S	H(PM6-D3H4)	S	PM6-D3H4	M06-2X	r2SCAN-3c		PBE-D3BJ	PBE-D3BJ (ATM)	PM6-D3H4	M06-2X	r2SCAN-3c		PBE-D3BJ	PBE-D3BJ (ATM)		PM6-D3H4	M06-2X	r2SCAN-3c		PBE-D3BJ	PBE-D3BJ (ATM)	PM6-D3H4	M06-2X	r2SCAN-3c		PBE-D3BJ	PBE-D3BJ (ATM)	PM6-D3H4	M06-2X	r2SCAN-3c		PBE-D3BJ	PBE-D3BJ (ATM)	PM6-D3H4	M06-2X	r2SCAN-3c		PBE-D3BJ	PBE-D3BJ (ATM)	PM6-D3H4	M06-2X	r2SCAN-3c		PBE-D3BJ	PBE-D3BJ (ATM)
			J/mol	J/K/mol	kcal/mol	kcal/K/mol		6-31G*	6-31G*	cc-pVTZ	def2-TZVP	def2-TZVP		6-31G*	6-31G*	cc-pVTZ	def2-TZVP	def2-TZVP			6-31G*	6-31G*	cc-pVTZ	def2-TZVP	def2-TZVP		6-31G*	6-31G*	cc-pVTZ	def2-TZVP	def2-TZVP		6-31G*	6-31G*	cc-pVTZ	def2-TZVP	def2-TZVP		6-31G*	6-31G*	cc-pVTZ	def2-TZVP	def2-TZVP		6-31G*	6-31G*	cc-pVTZ	def2-TZVP	def2-TZVP
	Catcher	ii	-7.43155e+08	862.655	-177618	0.206179	-177618	-1.44434e+06	-1.44413e+06	-1.44462e+06	-1.44369e+06	-1.44369e+06	-177680	-1.4444e+06	-1.44419e+06	-1.44468e+06	-1.44375e+06	-1.44375e+06	-38.8909	-177719	-1.44444e+06	-1.44423e+06	-1.44472e+06	-1.44379e+06	-1.44379e+06	0	0.132015	0.426167	0.381798	0.0472393	0.199634	1	0.801363	0.489266	0.527069	0.923819	0.715435	0.339735	0.275781	0.189409	0.201228	0.308776	0.255875	0.366774	0.355247	0.315148	0.322632	0.362855	0.348775
		ie	-7.43154e+08	866.933	-177618	0.207202	-177618	-1.44434e+06	-1.44413e+06	-1.44462e+06	-1.44369e+06	-1.44369e+06	-177680	-1.4444e+06	-1.44419e+06	-1.44468e+06	-1.44375e+06	-1.44375e+06	-38.8761	-177719	-1.44444e+06	-1.44423e+06	-1.44472e+06	-1.44379e+06	-1.44379e+06	0.0382699	0	0	0	0	0	1.87565	2	2	2	2	2	0.637222	0.688281	0.774259	0.763574	0.668476	0.7153	0.287156	0.257113	0.198094	0.20597	0.269232	0.239663
		iet	-7.43153e+08	861.265	-177618	0.205847	-177618	-1.44433e+06	-1.44413e+06	-1.44461e+06	-1.44369e+06	-1.44369e+06	-177680	-1.44439e+06	-1.44419e+06	-1.44468e+06	-1.44375e+06	-1.44375e+06	-34.885	-177714	-1.44443e+06	-1.44423e+06	-1.44471e+06	-1.44379e+06	-1.44379e+06	4.69193	9.59699	6.76859	7.65286	6.29217	7.81294	0.000763917	2.04081e-07	2.34551e-05	5.32184e-06	5.21551e-05	4.06859e-06	0.000259529	7.02324e-08	9.08014e-06	2.03181e-06	1.74322e-05	1.45513e-06	0.00214284	1.15683e-06	0.000105415	2.66301e-05	0.000191008	1.95576e-05
		ee	-7.43152e+08	852.465	-177617	0.203744	-177617	-1.44434e+06	-1.44413e+06	-1.44462e+06	-1.44369e+06	-1.44369e+06	-177679	-1.4444e+06	-1.44419e+06	-1.44468e+06	-1.44375e+06	-1.44375e+06	-38.9183	-177718	-1.44444e+06	-1.44423e+06	-1.44472e+06	-1.44379e+06	-1.44379e+06	1.61092	1.34689	1.41071	1.42122	1.60256	1.50137	0.0670617	0.104427	0.0938268	0.092186	0.0680084	0.0805898	0.0227832	0.0359376	0.0363231	0.0351954	0.022731	0.0288229	0.0861599	0.119528	0.120422	0.117793	0.0860147	0.102223
	Dimer	1	-1.48648e+09	1480.87	-355278	0.353937	-355278	-2.88871e+06	-2.8883e+06	-2.88927e+06	-2.88742e+06	-2.88742e+06	-355384	-2.88882e+06	-2.88841e+06	-2.88938e+06	-2.88753e+06	-2.88752e+06	-60.625	-355444	-2.88888e+06	-2.88847e+06	-2.88944e+06	-2.88759e+06	-2.88758e+06	0	0	0	0.00555559	0	2.64793	1	1	1	0.990724	1	0.0117769	0.890361	0.985285	0.895829	0.280286	0.447888	0.00555443	0.103396	0.014606	0.0985461	0.356508	0.359749	0.0288451
		2	-1.48643e+09	1497.06	-355265	0.357805	-355265	-2.8887e+06	-2.88829e+06	-2.88926e+06	-2.88741e+06	-2.88741e+06	-355372	-2.88881e+06	-2.8884e+06	-2.88937e+06	-2.88752e+06	-2.88752e+06	-70.2236	-355443	-2.88888e+06	-2.88847e+06	-2.88944e+06	-2.88759e+06	-2.88759e+06	1.86779	3.37398	1.89257	0	0.372709	0	0.0871724	0.0069686	0.0836234	2	1.07033	2	0.0776149	0.00686606	0.0749123	0.565821	0.479389	0.943275	0.198383	0.034201	0.194131	0.322223	0.352467	0.0550846
		3	-1.48642e+09	1475.36	-355264	0.352619	-355264	-2.8887e+06	-2.88829e+06	-2.88926e+06	-2.88741e+06	-2.88741e+06	-355369	-2.88881e+06	-2.8884e+06	-2.88937e+06	-2.88752e+06	-2.88751e+06	-64.8609	-355434	-2.88887e+06	-2.88846e+06	-2.88943e+06	-2.88758e+06	-2.88758e+06	10.3077	9.72789	5.96996	5.11426	5.5991	6.31421	3.09757e-08	8.19241e-08	4.47707e-05	0.000188086	8.3399e-05	2.51312e-05	2.75796e-08	8.07186e-08	4.01069e-05	5.32115e-05	3.73534e-05	1.18528e-05	4.80055e-07	1.31832e-06	0.000406041	0.000523667	0.000380821	0.000134446
		4	-1.48638e+09	1505.05	-355254	0.359715	-355254	-2.88869e+06	-2.88828e+06	-2.88925e+06	-2.8874e+06	-2.8874e+06	-355362	-2.8888e+06	-2.88839e+06	-2.88936e+06	-2.88751e+06	-2.88751e+06	-74.2612	-355436	-2.88887e+06	-2.88846e+06	-2.88944e+06	-2.88759e+06	-2.88758e+06	8.53032	9.14853	5.81899	1.47801	4.14958	2.74377	6.10689e-07	2.16504e-07	5.76733e-05	0.0838101	0.000948655	0.010028	5.43733e-07	2.13318e-07	5.16655e-05	0.0237108	0.000424891	0.00472958	7.84325e-06	3.27667e-06	0.000509975	0.0887215	0.00329871	0.0253218
		5A	-1.48639e+09	1512.5	-355256	0.361497	-355256	-2.88869e+06	-2.88828e+06	-2.88925e+06	-2.8874e+06	-2.8874e+06	-355365	-2.8888e+06	-2.88839e+06	-2.88936e+06	-2.88751e+06	-2.88751e+06	-71.4516	-355436	-2.88887e+06	-2.88846e+06	-2.88943e+06	-2.88758e+06	-2.88758e+06	8.39367	10.0601	9.9872	6.72122	7.70137	6.7477	7.6801e-07	4.69242e-08	5.30282e-08	1.26973e-05	2.45296e-06	1.21457e-05	6.83805e-07	4.62337e-08	4.75043e-08	3.5922e-06	1.09865e-06	5.72837e-06	9.70702e-06	7.80867e-07	8.01038e-07	4.50345e-05	1.5075e-05	6.91419e-05
		5B	-1.48639e+09	1494.83	-355255	0.357272	-355255	-2.88868e+06	-2.88827e+06	-2.88924e+06	-2.8874e+06	-2.88739e+06	-355362	-2.88878e+06	-2.88838e+06	-2.88935e+06	-2.88751e+06	-2.8875e+06	-63.5954	-355425	-2.88885e+06	-2.88845e+06	-2.88941e+06	-2.88757e+06	-2.88756e+06	19.0206	31.7778	25.0074	23.8179	21.1494	23.809	1.39268e-14	7.08696e-24	6.06156e-19	4.45778e-18	3.91793e-16	4.52497e-18	1.23999e-14	6.98267e-24	5.43013e-19	1.26115e-18	1.75479e-16	2.13415e-18	3.97058e-13	3.72306e-22	2.28376e-17	5.19777e-17	6.36621e-15	8.68351e-17
		6	-1.48643e+09	1495.38	-355266	0.357404	-355266	-2.8887e+06	-2.88829e+06	-2.88926e+06	-2.88741e+06	-2.88741e+06	-355373	-2.88881e+06	-2.8884e+06	-2.88937e+06	-2.88752e+06	-2.88751e+06	-66.7468	-355440	-2.88887e+06	-2.88847e+06	-2.88944e+06	-2.88759e+06	-2.88758e+06	4.85038	6.15259	4.68001	2.64401	3.87277	4.56054	0.000292812	3.29573e-05	0.000389674	0.0118546	0.00150924	0.000476138	0.000260708	3.24723e-05	0.000349081	0.00335378	0.000675972	0.000224565	0.00215139	0.000335605	0.00277876	0.0191087	0.00493416	0.00188665
		7A	-1.48639e+09	1508.57	-355256	0.360556	-355256	-2.88869e+06	-2.88828e+06	-2.88925e+06	-2.8874e+06	-2.8874e+06	-355364	-2.8888e+06	-2.88839e+06	-2.88936e+06	-2.88751e+06	-2.88751e+06	-73.1124	-355437	-2.88887e+06	-2.88846e+06	-2.88944e+06	-2.88759e+06	-2.88758e+06	7.22927	6.44256	5.67327	2.25178	4.65671	3.40738	5.41516e-06	2.02636e-05	7.36425e-05	0.0228888	0.000405205	0.00329448	4.82145e-06	1.99654e-05	6.59711e-05	0.00647548	0.000181486	0.0015538	5.90263e-05	0.000216056	0.000635057	0.0326347	0.00156338	0.0100485
		7B	-1.48638e+09	1491.8	-355252	0.356549	-355252	-2.88868e+06	-2.88827e+06	-2.88924e+06	-2.8874e+06	-2.88739e+06	-355359	-2.88878e+06	-2.88838e+06	-2.88935e+06	-2.8875e+06	-2.8875e+06	-65.3937	-355425	-2.88885e+06	-2.88845e+06	-2.88942e+06	-2.88757e+06	-2.88756e+06	19.8297	31.2296	23.8499	22.2737	21.4895	23.135	3.58473e-15	1.77751e-23	4.22461e-18	5.94332e-17	2.21457e-16	1.40151e-17	3.1917e-15	1.75135e-23	3.78453e-18	1.68143e-17	9.91878e-17	6.61003e-18	1.06533e-13	9.17693e-22	1.51819e-16	6.49439e-16	3.65502e-15	2.61479e-16
		8A	-1.48639e+09	1503.11	-355256	0.359251	-355256	-2.88868e+06	-2.88827e+06	-2.88924e+06	-2.8874e+06	-2.88739e+06	-355364	-2.88879e+06	-2.88838e+06	-2.88935e+06	-2.8875e+06	-2.8875e+06	-72.0667	-355436	-2.88886e+06	-2.88845e+06	-2.88942e+06	-2.88758e+06	-2.88757e+06	8.86734	16.2984	16.5298	13.4592	13.2969	12.1004	6.93959e-07	2.67901e-12	1.81708e-12	3.13508e-10	4.11628e-10	3.06266e-09	6.17874e-07	2.63959e-12	1.62779e-12	8.86946e-11	1.84363e-10	1.44446e-09	8.83373e-06	7.03725e-11	4.41845e-11	2.05291e-09	4.13233e-09	2.94028e-08
		8B	-1.48639e+09	1489.48	-355256	0.355994	-355256	-2.88868e+06	-2.88828e+06	-2.88925e+06	-2.8874e+06	-2.88739e+06	-355363	-2.88879e+06	-2.88838e+06	-2.88935e+06	-2.88751e+06	-2.8875e+06	-63.6188	-355426	-2.88885e+06	-2.88845e+06	-2.88942e+06	-2.88757e+06	-2.88756e+06	18.2198	28.0552	22.7385	21.9204	19.6217	22.3117	1.06724e-13	7.30063e-21	5.45053e-17	2.14977e-16	1.01614e-14	1.11523e-16	9.50224e-14	7.19321e-21	4.88274e-17	6.08191e-17	4.55118e-15	5.25984e-17	2.84922e-12	3.33629e-19	1.83387e-15	2.2709e-15	1.50295e-13	1.97159e-15
		9	-1.48633e+09	1511.01	-355242	0.361139	-355242	-2.88868e+06	-2.88827e+06	-2.88924e+06	-2.88739e+06	-2.88739e+06	-355351	-2.88879e+06	-2.88838e+06	-2.88935e+06	-2.8875e+06	-2.8875e+06	-76.3717	-355427	-2.88887e+06	-2.88846e+06	-2.88943e+06	-2.88758e+06	-2.88758e+06	17.5255	14.3113	13.8367	8.98029	12.8273	10.4559	1.71e-13	3.75372e-11	8.32191e-11	2.87096e-07	4.52404e-10	2.41568e-08	1.52251e-13	3.69848e-11	7.45501e-11	8.12224e-08	2.02626e-10	1.13933e-08	4.49343e-12	8.88395e-10	1.73847e-09	1.32604e-06	4.52255e-09	2.08386e-07
		10	-1.48645e+09	1495.84	-355271	0.357515	-355271	-2.88871e+06	-2.8883e+06	-2.88927e+06	-2.88742e+06	-2.88741e+06	-355378	-2.88881e+06	-2.8884e+06	-2.88937e+06	-2.88752e+06	-2.88752e+06	-64.3476	-355442	-2.88888e+06	-2.88847e+06	-2.88944e+06	-2.88759e+06	-2.88758e+06	2.11705	2.97221	2.16245	1.11278	1.67819	3.29694	0.0286927	0.00683595	0.0265887	0.154654	0.0599059	0.00396499	0.0255469	0.00673536	0.023819	0.0437531	0.0268311	0.00187004	0.0936865	0.0336794	0.089018	0.136912	0.0970801	0.0117472
		11	-1.48646e+09	1483.52	-355272	0.354569	-355272	-2.88871e+06	-2.8883e+06	-2.88926e+06	-2.88742e+06	-2.88741e+06	-355378	-2.88881e+06	-2.8884e+06	-2.88937e+06	-2.88752e+06	-2.88752e+06	-62.713	-355441	-2.88887e+06	-2.88847e+06	-2.88943e+06	-2.88759e+06	-2.88758e+06	3.53896	4.90929	4.54038	4.30049	3.95862	6.1182	0.00264198	0.000265261	0.000492511	0.000736496	0.00130683	3.49143e-05	0.00235232	0.000261358	0.000441206	0.000208362	0.000585311	1.64669e-05	0.0142371	0.0021561	0.00340876	0.00176613	0.00435669	0.000181369
		12	-1.48642e+09	1503.19	-355263	0.359272	-355263	-2.8887e+06	-2.88829e+06	-2.88926e+06	-2.88741e+06	-2.88741e+06	-355370	-2.88881e+06	-2.8884e+06	-2.88937e+06	-2.88752e+06	-2.88751e+06	-67.2863	-355438	-2.88887e+06	-2.88846e+06	-2.88943e+06	-2.88758e+06	-2.88758e+06	6.87457	6.62202	5.72579	3.56237	5.2878	5.56041	9.81751e-06	1.49962e-05	6.74318e-05	0.00254025	0.000140583	8.89909e-05	8.74113e-06	1.47755e-05	6.04074e-05	0.000718662	6.29653e-05	4.19715e-05	0.000101812	0.000164341	0.000586821	0.00520176	0.000609059	0.00042301
		13	-1.4864e+09	1510.79	-355259	0.361088	-355259	-2.8887e+06	-2.88829e+06	-2.88926e+06	-2.88741e+06	-2.8874e+06	-355367	-2.8888e+06	-2.88839e+06	-2.88936e+06	-2.88751e+06	-2.88751e+06	-70.6672	-355438	-2.88887e+06	-2.88847e+06	-2.88943e+06	-2.88759e+06	-2.88758e+06	6.4728	5.55791	5.36786	2.90548	4.61062	4.02872	1.92612e-05	8.9365e-05	0.000122917	0.00764561	0.000437773	0.00116184	1.71494e-05	8.805e-05	0.000110113	0.00216302	0.000196073	0.00054797	0.00018819	0.000822177	0.00100357	0.0132728	0.00167388	0.00411486
		14	-1.48643e+09	1497.82	-355264	0.357987	-355264	-2.8887e+06	-2.88829e+06	-2.88926e+06	-2.88741e+06	-2.88741e+06	-355372	-2.8888e+06	-2.8884e+06	-2.88937e+06	-2.88752e+06	-2.88752e+06	-69.5261	-355441	-2.88887e+06	-2.88847e+06	-2.88944e+06	-2.88759e+06	-2.88758e+06	3.25195	5.28862	3.46887	2.00191	1.41496	1.59348	0.00427579	0.000140391	0.00297161	0.0348051	0.0931599	0.0690525	0.003807	0.000138325	0.00266206	0.00984672	0.0417251	0.0325677	0.0212085	0.00122914	0.0157824	0.0454979	0.132546	0.111526
		15	-1.4864e+09	1511.51	-355258	0.36126	-355258	-2.8887e+06	-2.88829e+06	-2.88926e+06	-2.88741e+06	-2.8874e+06	-355366	-2.8888e+06	-2.8884e+06	-2.88937e+06	-2.88752e+06	-2.88751e+06	-70.7853	-355437	-2.88888e+06	-2.88847e+06	-2.88944e+06	-2.88759e+06	-2.88758e+06	7.33413	4.49083	3.78121	0.974441	3.48014	2.59658	4.54172e-06	0.000535192	0.00175979	0.195046	0.00291595	0.0128362	4.04377e-06	0.000527317	0.00157647	0.0551806	0.00130602	0.00605404	5.02169e-05	0.00398003	0.0101723	0.159866	0.00867297	0.0309182
		16	-1.48639e+09	1509.47	-355257	0.360771	-355257	-2.88869e+06	-2.88828e+06	-2.88925e+06	-2.8874e+06	-2.8874e+06	-355365	-2.8888e+06	-2.88839e+06	-2.88936e+06	-2.88751e+06	-2.88751e+06	-73.0799	-355438	-2.88887e+06	-2.88847e+06	-2.88944e+06	-2.88759e+06	-2.88758e+06	6.35239	6.1843	5.54122	2.09481	3.85488	2.91538	2.35723e-05	3.125e-05	9.19009e-05	0.0297829	0.00155521	0.00751969	2.09878e-05	3.07901e-05	8.23275e-05	0.00842588	0.000696561	0.00354657	0.000226072	0.000319858	0.000774274	0.0402458	0.00506355	0.0200089
	Energies		PM6-D3H4	M06-2X	r2SCAN-3c		PBE-D3BJ	PBE-D3BJ (ATM)					-177680	-1.4444e+06	-1.44419e+06	-1.44468e+06	-1.44375e+06	-1.44375e+06		-177719	-1.44444e+06	-1.44423e+06	-1.44472e+06	-1.44379e+06	-1.44379e+06							2.94347	2.90579	2.58312	2.61926	2.99188	2.79603	1	1	1	1	1	1
	(kcal/mol)			6-31G*	6-31G*	cc-pVTZ	def2-TZVP	def2-TZVP					-355384	-2.88882e+06	-2.88841e+06	-2.88938e+06	-2.88753e+06	-2.88752e+06		-355444	-2.88888e+06	-2.88847e+06	-2.88944e+06	-2.88759e+06	-2.88759e+06							1.12314	1.01493	1.11628	3.53469	2.2327	2.12027	1	1	1	1	1	1
	Catcher	ii	-178054	-1.44477e+06	-1.44457e+06	-1.44505e+06	-1.44413e+06	-1.44413e+06
		ie	-178053	-1.44477e+06	-1.44457e+06	-1.44505e+06	-1.44413e+06	-1.44413e+06
		iet	-178053	-1.44477e+06	-1.44456e+06	-1.44505e+06	-1.44413e+06	-1.44412e+06
		ee	-178053	-1.44477e+06	-1.44457e+06	-1.44505e+06	-1.44413e+06	-1.44413e+06
	Dimer	1	-356149	-2.88958e+06	-2.88918e+06	-2.89014e+06	-2.88829e+06	-2.88829e+06
		2	-356136	-2.88957e+06	-2.88916e+06	-2.89013e+06	-2.88828e+06	-2.88828e+06
		3	-356136	-2.88957e+06	-2.88917e+06	-2.89013e+06	-2.88829e+06	-2.88828e+06
		4	-356125	-2.88956e+06	-2.88915e+06	-2.89013e+06	-2.88827e+06	-2.88827e+06
		5A	-356127	-2.88956e+06	-2.88915e+06	-2.89012e+06	-2.88827e+06	-2.88827e+06
		5B	-356126	-2.88955e+06	-2.88915e+06	-2.89011e+06	-2.88827e+06	-2.88826e+06
		6	-356137	-2.88957e+06	-2.88916e+06	-2.89013e+06	-2.88828e+06	-2.88828e+06
		7A	-356127	-2.88956e+06	-2.88915e+06	-2.89013e+06	-2.88828e+06	-2.88827e+06
		7B	-356124	-2.88955e+06	-2.88915e+06	-2.89011e+06	-2.88827e+06	-2.88826e+06
		8A	-356127	-2.88955e+06	-2.88915e+06	-2.89012e+06	-2.88827e+06	-2.88827e+06
		8B	-356127	-2.88955e+06	-2.88915e+06	-2.89012e+06	-2.88827e+06	-2.88826e+06
		9	-356113	-2.88955e+06	-2.88914e+06	-2.89011e+06	-2.88826e+06	-2.88826e+06
		10	-356142	-2.88958e+06	-2.88917e+06	-2.89014e+06	-2.88829e+06	-2.88828e+06
		11	-356144	-2.88958e+06	-2.88917e+06	-2.89014e+06	-2.88829e+06	-2.88828e+06
		12	-356134	-2.88957e+06	-2.88916e+06	-2.89013e+06	-2.88828e+06	-2.88828e+06
		13	-356130	-2.88957e+06	-2.88916e+06	-2.89013e+06	-2.88828e+06	-2.88827e+06
		14	-356136	-2.88957e+06	-2.88916e+06	-2.89013e+06	-2.88828e+06	-2.88828e+06
		15	-356129	-2.88957e+06	-2.88916e+06	-2.89013e+06	-2.88828e+06	-2.88828e+06
		16	-356128	-2.88956e+06	-2.88915e+06	-2.89013e+06	-2.88828e+06	-2.88827e+06
	Energies		PM6-D3H4	M06-2X	r2SCAN-3c		PBE-D3BJ	PBE-D3BJ (ATM)
	(Eh)			6-31G*	6-31G*	cc-pVTZ	def2-TZVP	def2-TZVP
	Catcher	ii	-283.746	-2302.39	-2302.06	-2302.84	-2301.36	0.527196
		ie	-283.746	-2302.39	-2302.06	-2302.84	-2301.36	0.374801
		iet	-283.745	-2302.38	-2302.06	-2302.83	-2301.36	1.89557
		ee	-283.746	-2302.39	-2302.06	-2302.84	-2301.36	0.273608
	Dimer	1	-567.56	-4604.85	-4604.19	-4605.73	-4602.79	6.43973
		2	-567.539	-4604.82	-4604.17	-4605.72	-4602.77	3.41909
		3	-567.538	-4604.82	-4604.18	-4605.72	-4602.78	4.50691
		4	-567.521	-4604.81	-4604.16	-4605.71	-4602.76	2.38599
		5A	-567.525	-4604.81	-4604.16	-4605.7	-4602.76	2.83812
		5B	-567.522	-4604.79	-4604.15	-4605.69	-4602.75	6.45136
		6	-567.54	-4604.82	-4604.17	-4605.72	-4602.77	4.47957
		7A	-567.525	-4604.81	-4604.16	-4605.71	-4602.76	2.54247
		7B	-567.519	-4604.79	-4604.15	-4605.69	-4602.75	5.43727
		8A	-567.524	-4604.8	-4604.15	-4605.69	-4602.75	2.59534
		8B	-567.524	-4604.79	-4604.15	-4605.69	-4602.75	6.48176
		9	-567.502	-4604.79	-4604.14	-4605.69	-4602.74	1.42041
		10	-567.549	-4604.83	-4604.18	-4605.72	-4602.78	5.41054
		11	-567.551	-4604.83	-4604.18	-4605.72	-4602.78	5.95138
		12	-567.535	-4604.82	-4604.17	-4605.71	-4602.77	4.0644
		13	-567.529	-4604.82	-4604.16	-4605.71	-4602.76	3.2099
		14	-567.538	-4604.82	-4604.17	-4605.71	-4602.77	3.97032
		15	-567.528	-4604.82	-4604.17	-4605.71	-4602.76	2.90824
		16	-567.525	-4604.81	-4604.16	-4605.71	-4602.76	2.85229
[truncated: 13 more columns]
